# Supplementary material for: A New High-Pressure High-Temperature Phase of Silver Antimonate AgSbO3 with Strong Ag–O Hybridization
Source: PubMed Central journal article supplement (PMC11600496; doi:10.1021/acs.inorgchem.4c03021), 2024-11-11
Supplement: ic4c03021_si_001.pdf [file ic4c03021_si_001.pdf]

# Supporting Information: A New High-Pressure High-Temperature Phase of Silver Antimonate $\text{AgSbO}_3$ with Strong Ag-O Hybridization

Mohamed Oudah,<sup>\*,†,‡</sup> Minu Kim,<sup>†</sup> Robert Dinnebier,<sup>†</sup> Graham McNally,<sup>†</sup>

Kateryna Foyevtsova,<sup>‡</sup> Doug Bonn,<sup>‡</sup> and Hidenori Takagi<sup>†</sup>

<sup>†</sup>*Max Planck Institute for Solid State Research, Heisenbergstrasse 1, 70569 Stuttgart,  
Germany*

<sup>‡</sup>*Stewart Blusson Quantum Matter Institute, University of British Columbia, Vancouver,  
BC V6T 1Z4, Canada*

E-mail: mohamed.oudah@ubc.ca

Table S1: Atomic positions in the high-pressure monoclinic- $\text{AgSbO}_3$  ( $C2/c$ ) Phase.

|     | x           | y            | z            | Occ. | Site |
|-----|-------------|--------------|--------------|------|------|
| Ag1 | 0.5         | -0.0155(2)   | 0.75         | 1    | 4e   |
| Ag2 | 0.8019(2)   | -0.61300(16) | -0.00700(17) | 1    | 8f   |
| Sb1 | 0           | 0.1265(2)    | 0.75         | 1    | 4e   |
| Sb2 | 0.6541(2)   | 0.68846(13)  | 0.12384(18)  | 1    | 8f   |
| O1  | -0.3347(13) | 0.4849(12)   | -0.2591(12)  | 1    | 8f   |
| O2  | 0.0115(13)  | 0.8619(11)   | -0.9691(13)  | 1    | 8f   |
| O3  | 0.8440(14)  | 0.2681(12)   | -0.2390(13)  | 1    | 8f   |
| O4  | 0.5         | -0.2093(17)  | 0.25         | 1    | 4e   |
| O5  | 2.1674(14)  | -1.3724(10)  | -0.4809(12)  | 1    | 8f   |

Table S2: Select Ag-O and Sb-O distances in the high-pressure monoclinic-AgSbO<sub>3</sub> (*C2/c*) phase.

| Atoms  | Distance (Å) | Multiplicity |
|--------|--------------|--------------|
| Ag1-O3 | 2.514        | 2            |
| Ag1-O4 | 2.220        | 1            |
| Ag2-O1 | 2.689        | 2            |
| Ag2-O2 | 2.498        | 1            |
| Ag2-O3 | 2.414        | 1            |
| Ag2-O5 | 2.393        | 1            |
| Sb1-O1 | 1.980        | 2            |
| Sb1-O2 | 1.964        | 2            |
| Sb1-O3 | 1.926        | 2            |
| Sb2-O1 | 2.007        | 1            |
| Sb2-O2 | 2.010        | 1            |
| Sb2-O3 | 2.045        | 1            |
| Sb2-O4 | 2.012        | 1            |
| Sb2-O5 | 2.047        | 2            |

Table S3: Selected bond angles in the high-pressure monoclinic-AgSbO<sub>3</sub> (*C2/c*) phase.

| Atoms      | Angle (deg) |
|------------|-------------|
| O3-Ag1-O4  | 148.2       |
| O3-Ag1-O3  | 63.6        |
| O3-Ag2-O5  | 115.2       |
| Sb1-O1-Sb2 | 126.7       |
| Sb1-O2-Sb2 | 130.6       |
| Sb1-O3-Sb2 | 130.7       |
| Sb2-O4-Sb2 | 119.8       |
| Sb2-O5-Sb2 | 94.1        |

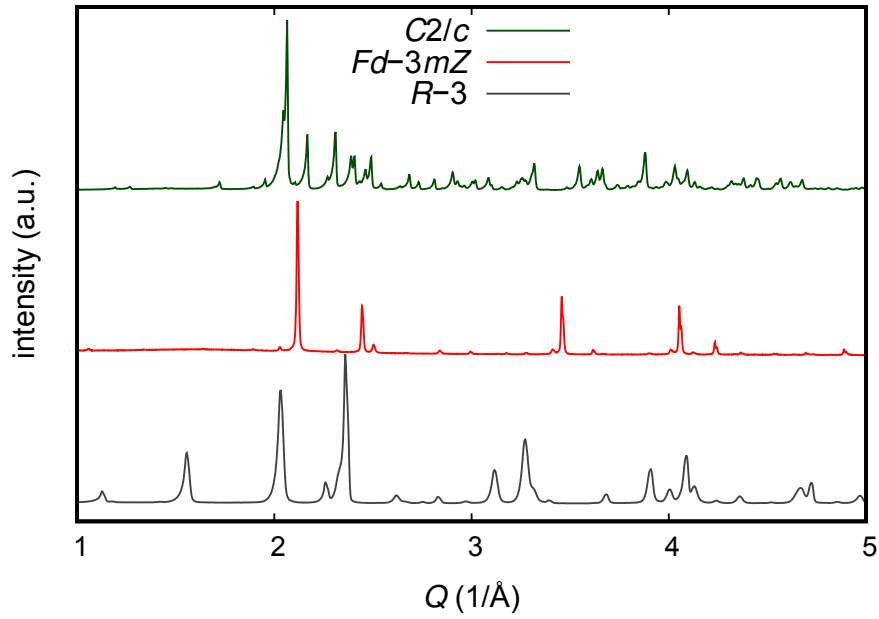

Figure S1: Comparison of x-ray diffraction pattern of the three phases of  $\text{AgSbO}_3$ , ilmenite (synthesized at ambient pressure,  $R\bar{3}$  symmetry), defect pyrochlore (synthesized at 4 GPa,  $Fd\bar{3}mZ$  symmetry), and high-pressure monoclinic-phase (synthesized at 16 GPa,  $C2/c$  symmetry). All patterns were measured at ambient conditions.  $R\bar{3}$  and  $C2/c$  phases were measured with  $\text{Ag}_{K\alpha 1}$  source (0.5594  $\text{\AA}$ ), while  $Fd\bar{3}mZ$  phase was measured with  $\text{Cu}_{K\alpha 1}$  source (1.5406  $\text{\AA}$ ). Data plotted as a function of  $Q$  for ease of comparison.

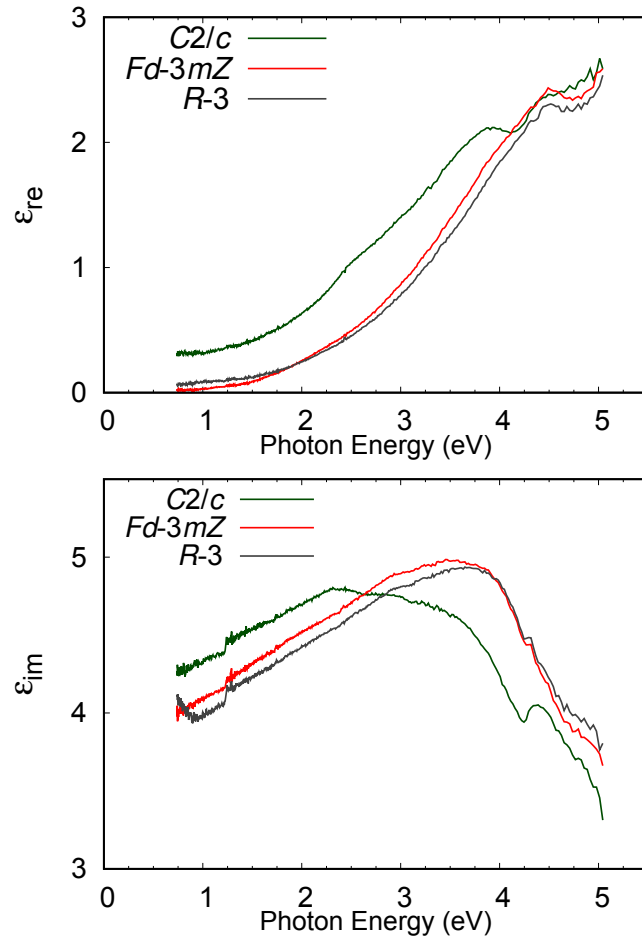

Figure S2: Real and imaginary parts of the dielectric constant of  $\text{AgSbO}_3$ , ilmenite (synthesized at ambient pressure,  $R\bar{3}$  symmetry), defect pyrochlore (synthesized at 4 GPa,  $Fd\bar{3}mZ$  symmetry), and high-pressure monoclinic-phase (synthesized at 16 GPa,  $C2/c$  symmetry).

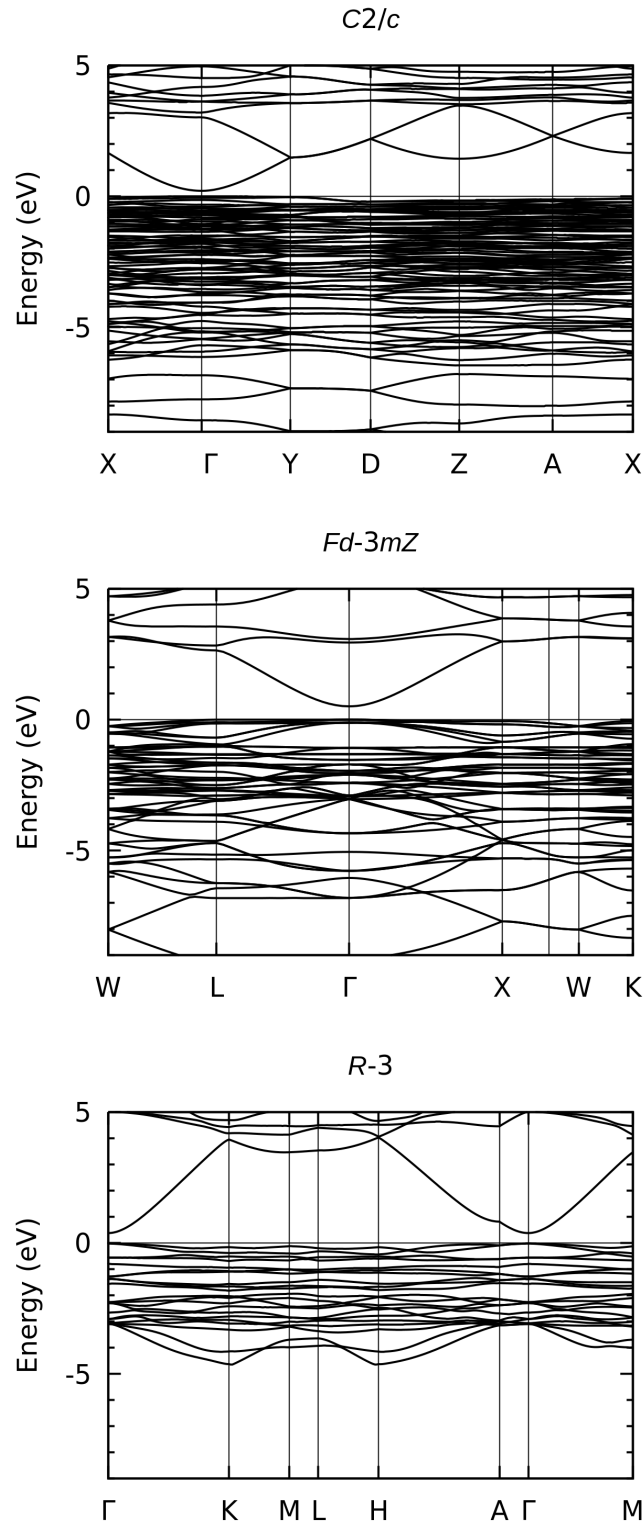

Figure S3: The calculated band structures of all three  $\text{AgSbO}_3$  structures, ilmenite (synthesized at ambient pressure,  $R\bar{3}$  symmetry), defect pyrochlore (synthesized at 4 GPa,  $Fd\bar{3}mZ$  symmetry), and high-pressure monoclinic-phase (synthesized at 16 GPa,  $C2/c$  symmetry). Higher density of bands can be seen for the  $C2/c$  structure reflecting the higher number atoms in the unit cell.

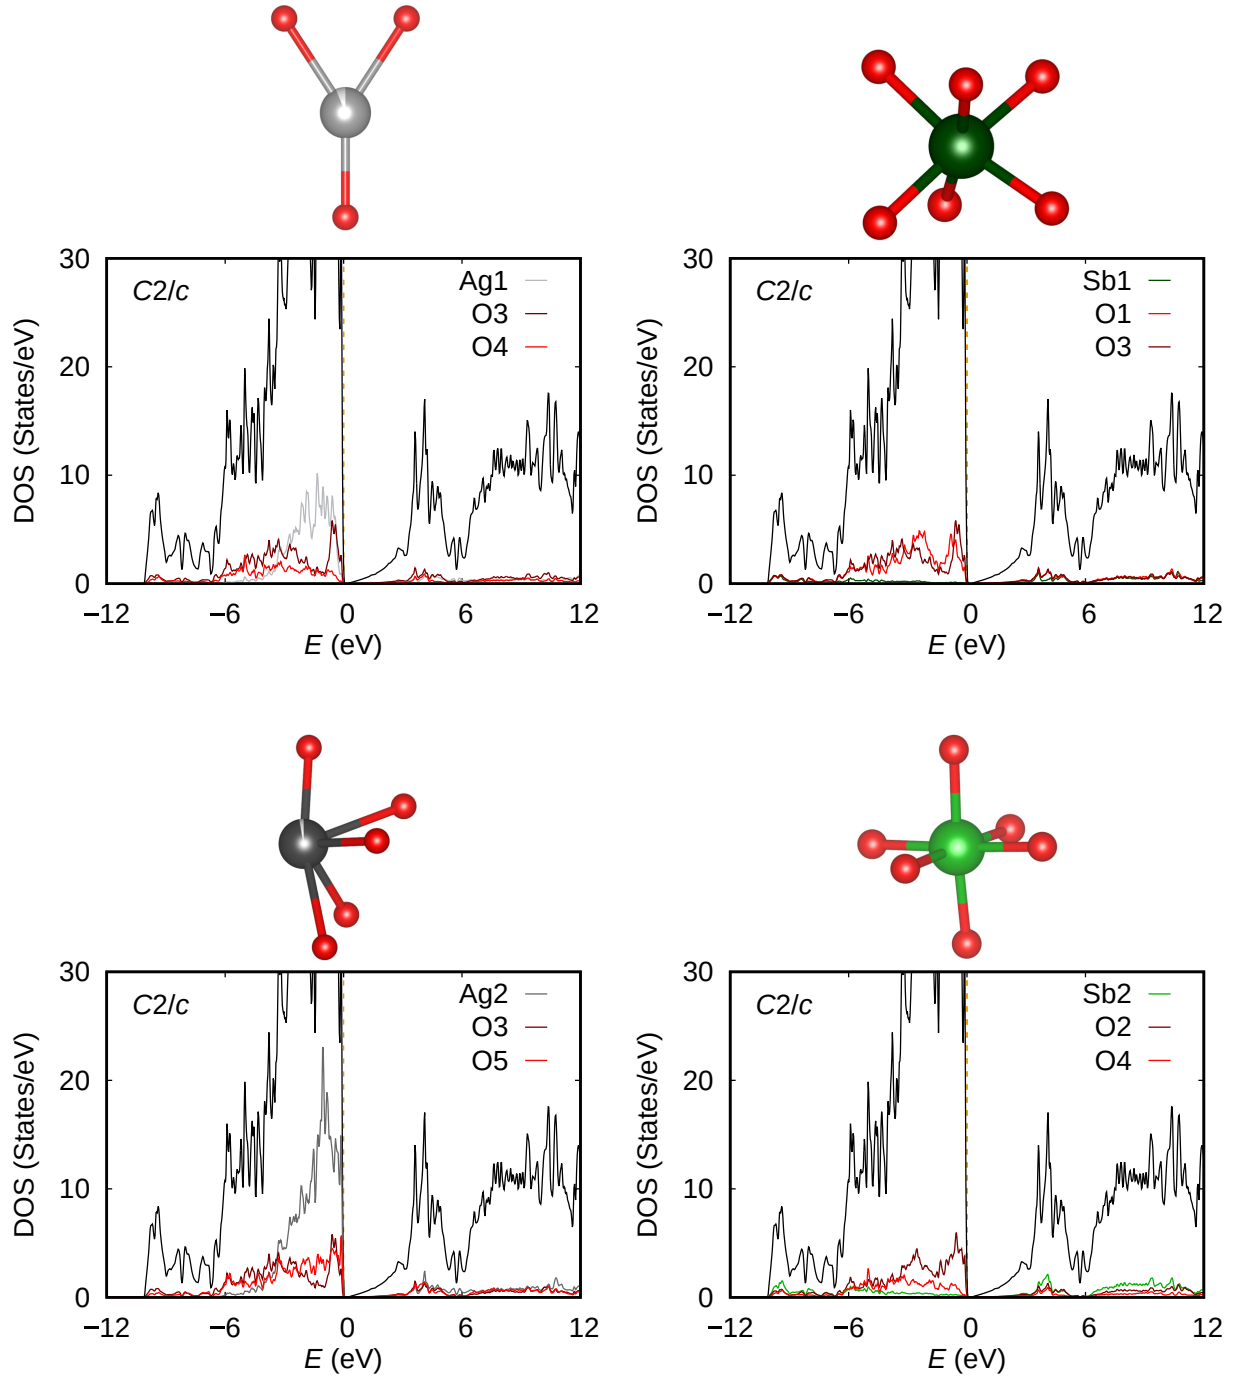

Figure S4: Partial density of states for the different unique atoms in the unit cell of the high-pressure monoclinic-phase of  $\text{AgSbO}_3$  (synthesized at 16 GPa,  $C2/c$  symmetry), where contribution from atoms structurally close to each other are grouped together.

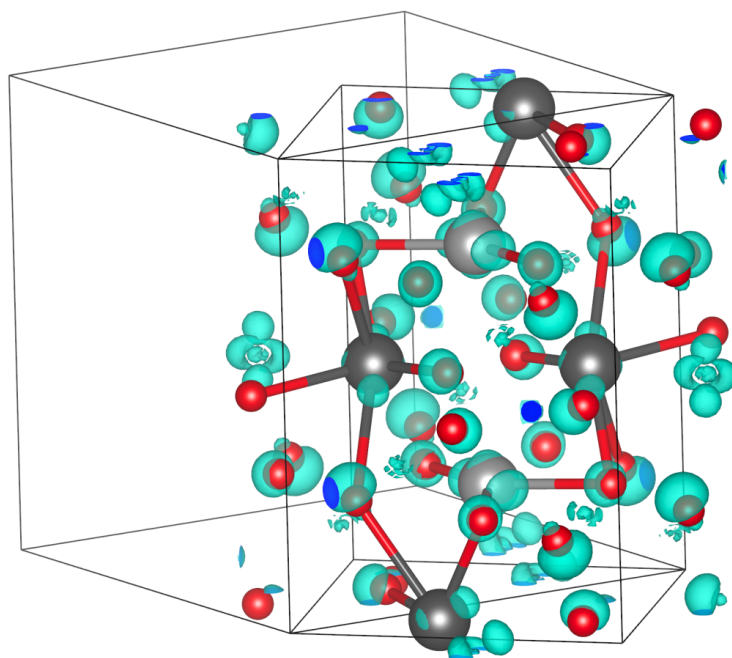

Figure S5: The absolute value of the wave function squared associated with the band above the Fermi level in the high-pressure monoclinic-phase of  $\text{AgSbO}_3$  (synthesized at 16 GPa,  $C2/c$  symmetry). Only the Ag and O atoms in the unit cell are shown to demonstrate that the band is dominated by MO states associated with Ag-O hybridization and O atoms part of the Sb octahedra. The two Ag1 atoms shown in light grey, while the four Ag2 atoms are shown in dark grey.
